# Supplementary material for: Nitrogen–phosphorus codoped carbon nanotube sponges for detecting volatile organic compounds: experimental and DFT calculations
Source: Royal Society of Chemistry journal article supplement (doi:10.1039/d2cp04983j), 2022-12-13
Supplement: d2cp04983j1.pdf [file d2cp04983j1.pdf]

## Supplementary Information

### Nitrogen-Phosphorus Codoped Carbon Nanotube Sponges for Detecting Volatile Organic Compounds: Experimental and DFT-Calculations

Armando D. Martínez-Iniesta<sup>1</sup>, Emilio Muñoz-Sandoval<sup>1</sup>, Juan P. Morán-Lázaro<sup>2</sup>, Aarón Morelos-Gómez<sup>3</sup>, Florentino López-Urías<sup>1\*</sup>

**Figure S1:** Armando D. Martínez-Iniesta et al.

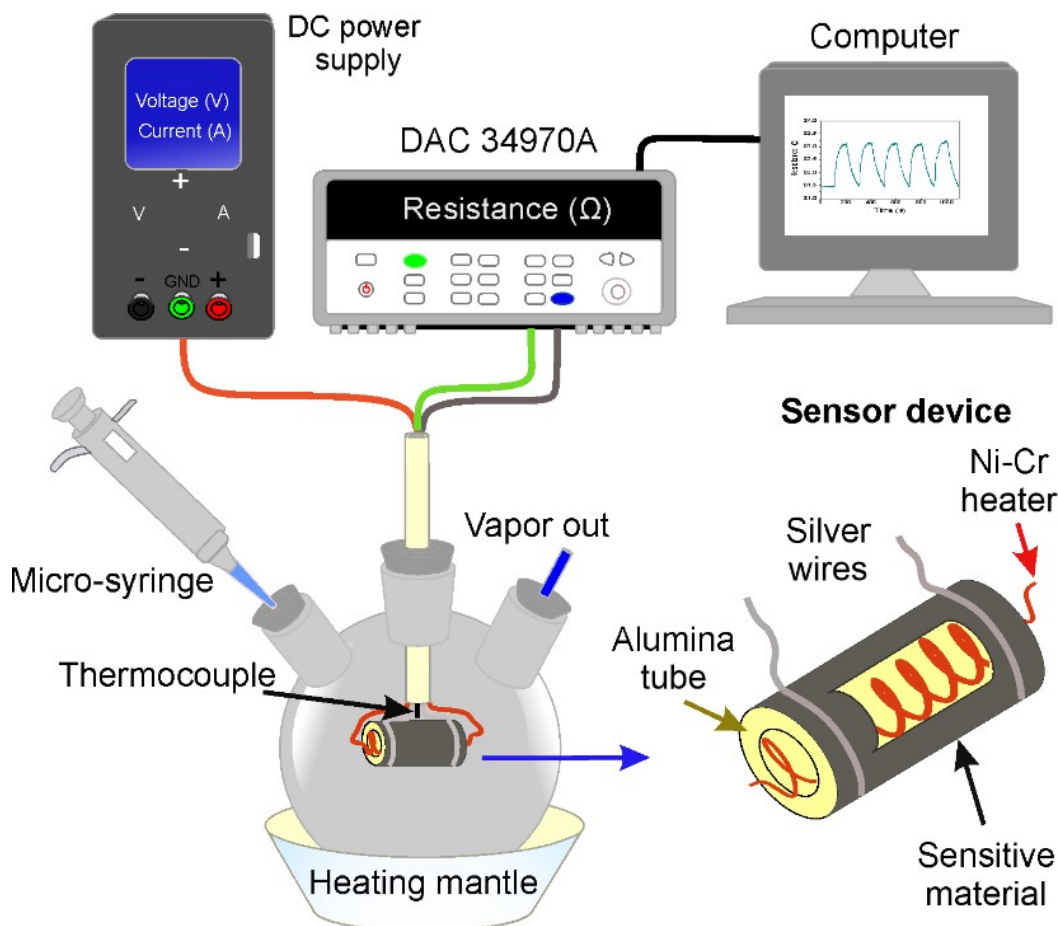

**Figure S1:** Schematic illustration of the vapor sensing system and the sensor device. The carbon nanotube sponges (NP-CNTSSs) are used as sensitive materials in this study. Acetone, cyclohexane, ethanol, isopropanol, and methanol gas vapors were selected to assess the sensor performance. A Ni-Cr heating wire controls the sensor device temperature by tuning the voltage. The sensing measurements were carried out at a relative humidity of 30%.

Figure S2: Armando D. Martínez-Iniesta et al.

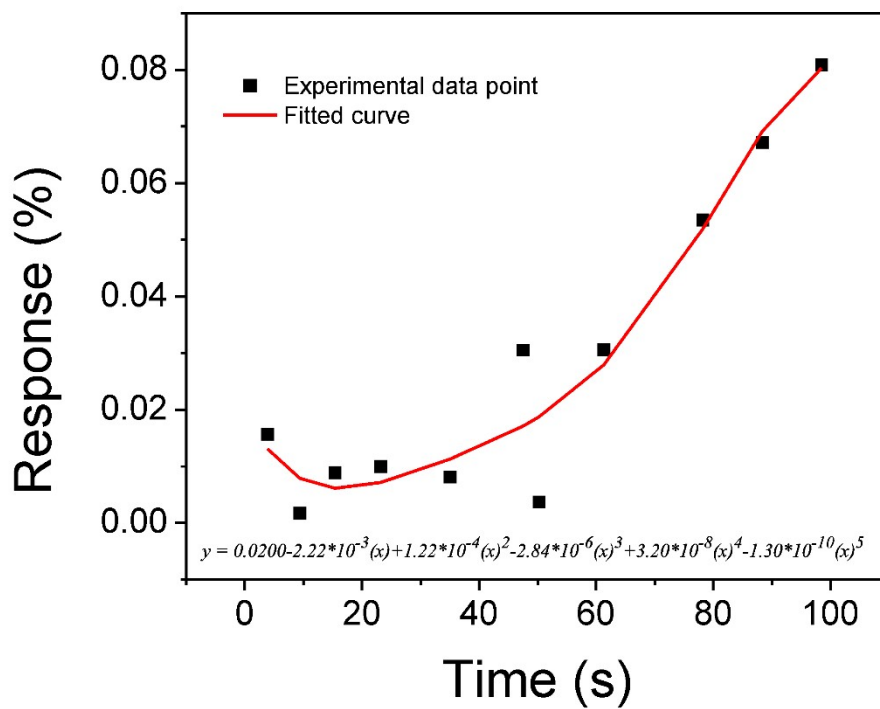

Figure S2: Eleven data points of the response signal in air fitted to the 5th order polynomial.

**Figure S3:** Armando D. Martínez-Iniesta et al.

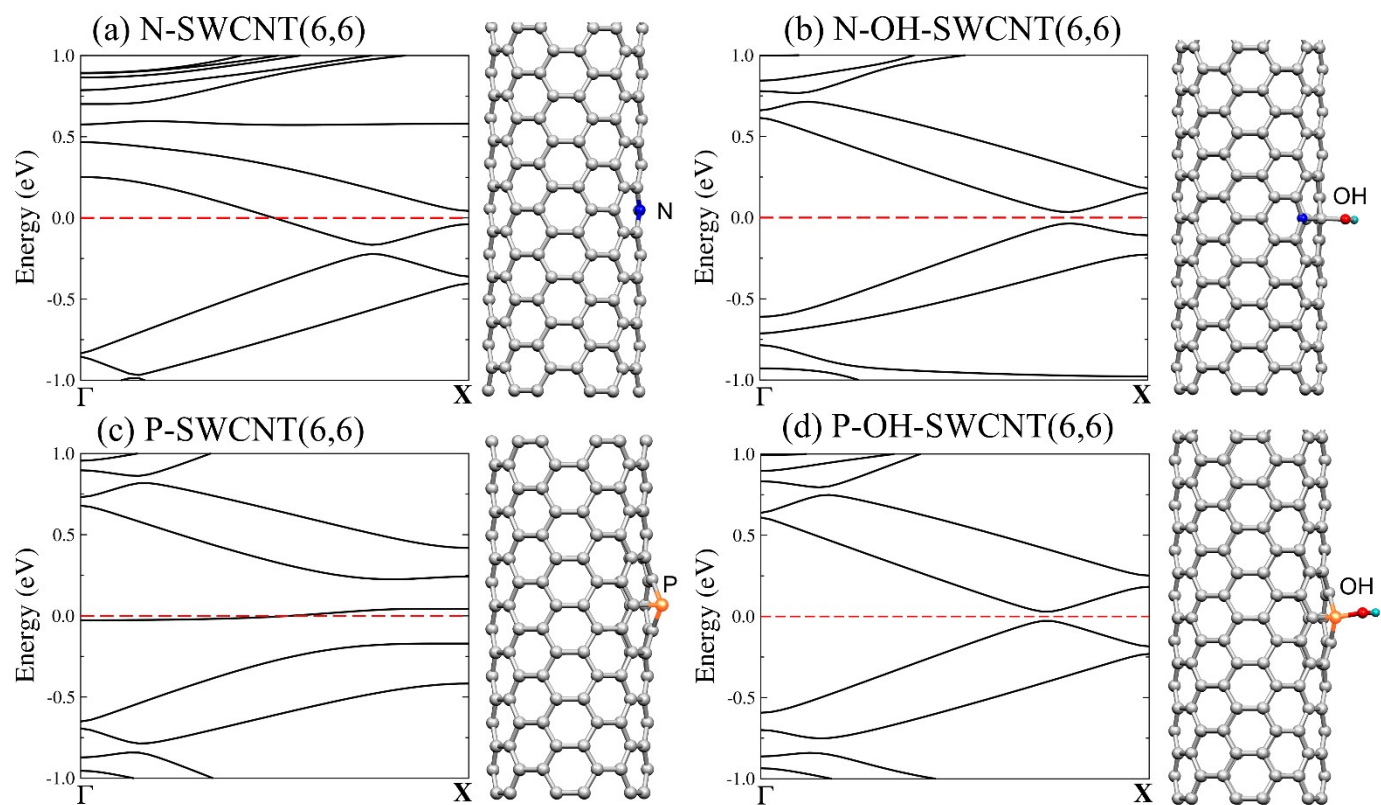

**Figure S3:** Band structure and optimized structure of P- and N-doped and functionalized SWCNT(6,6) . (a) N-SWCNT(6,6), (b) N-OH-SWCNT(6,6), (c) P-SWCNT(6,6), and (d) P-OH-SWCNT(6,6). In all cases, the Fermi level was shifted to zero represented by the dashed line.

**Figure S4:** Armando D. Martínez-Iniesta et al.

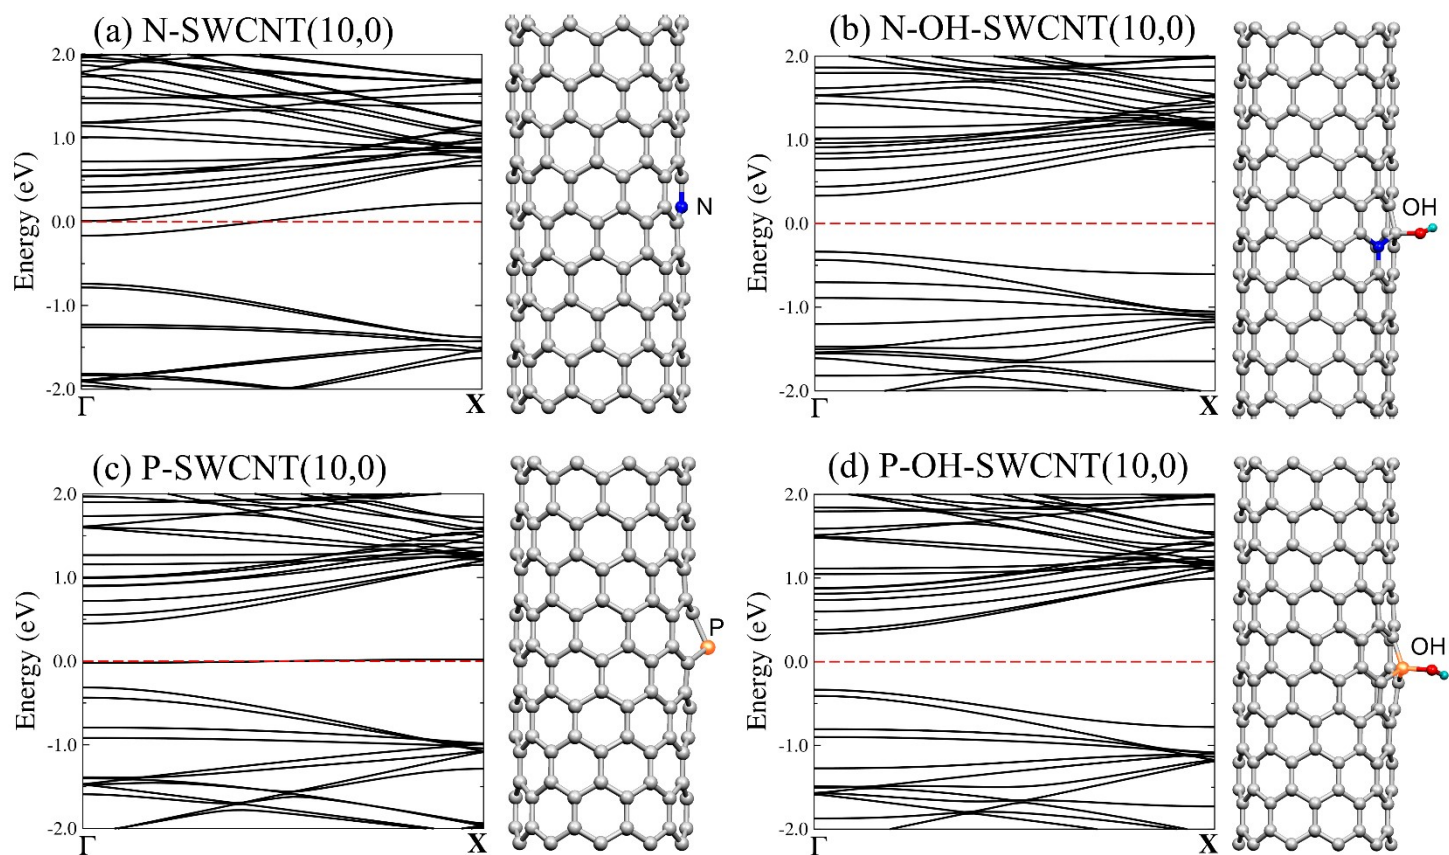

**Figure S4:** Band structure and optimized structure of P- and N-doped and functionalized SWCNT(10,0) . **(a)** N-SWCNT(10,0), **(b)** N-OH-SWCNT(10,0), **(c)** P-SWCNT(10,10), and **(d)** P-OH-SWCNT(10,0). In all cases, the Fermi level was shifted to zero represented by the dashed line.

**Figure S5:** Armando D. Martínez-Iniesta et al.

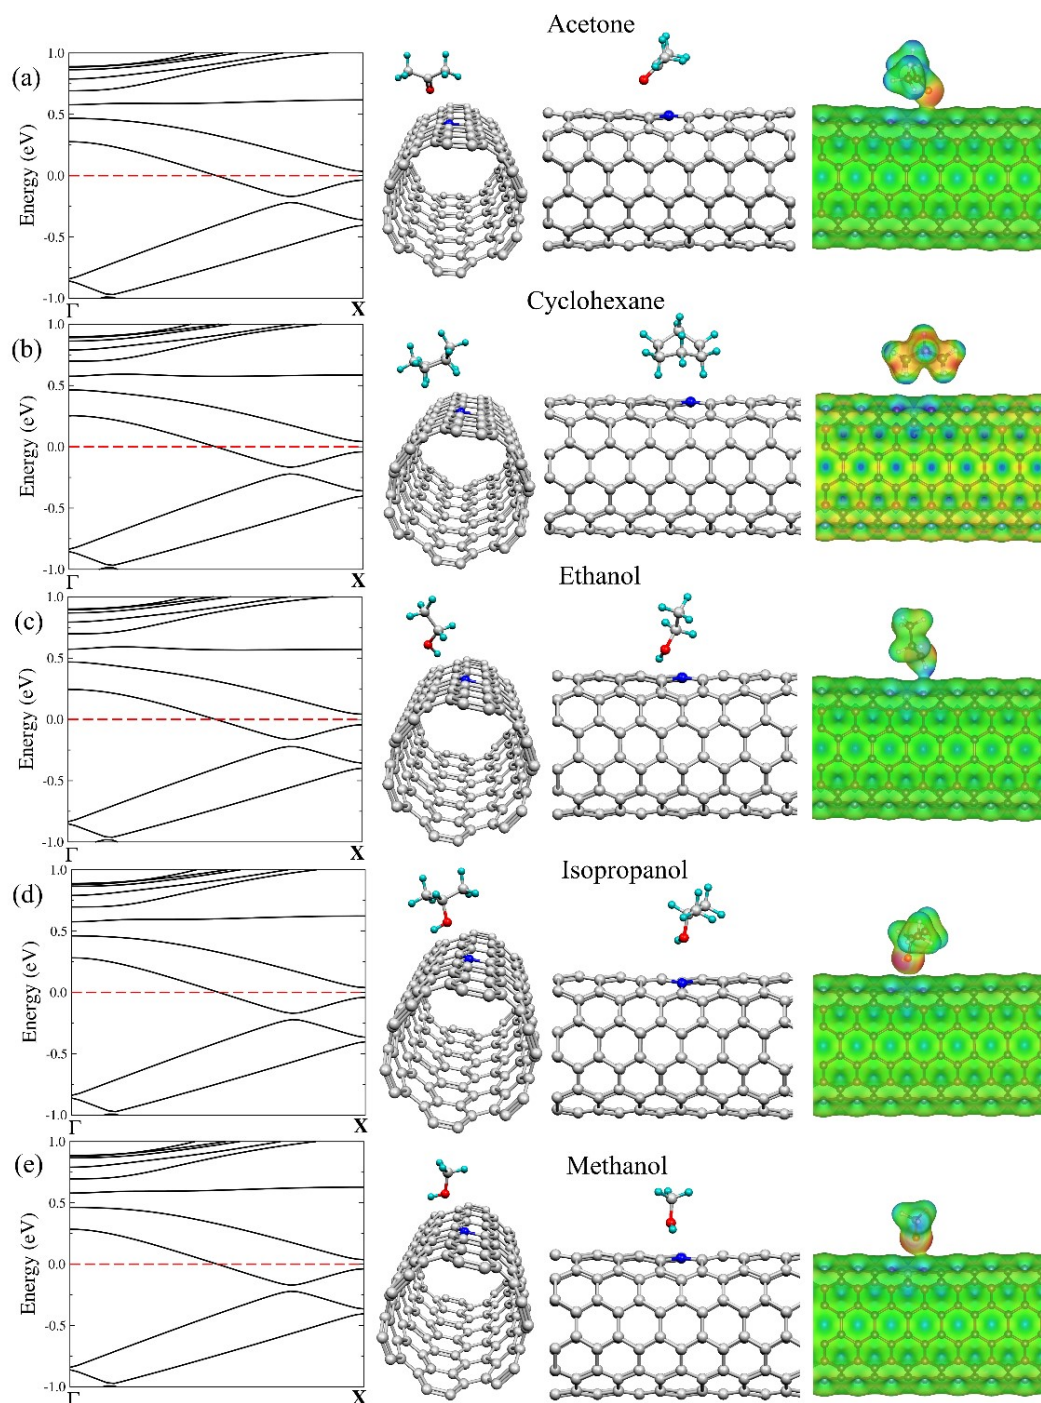

**Figure S5:** : Band structure, optimized structures, and electrostatic potential surface calculations of N-SWCNT(6,6) interacting with (a) acetone, (b) cyclohexane, (c) ethanol, (d) isopropanol, and (e) methanol molecules.

Figure S6: Armando D. Martínez-Iniesta et al.

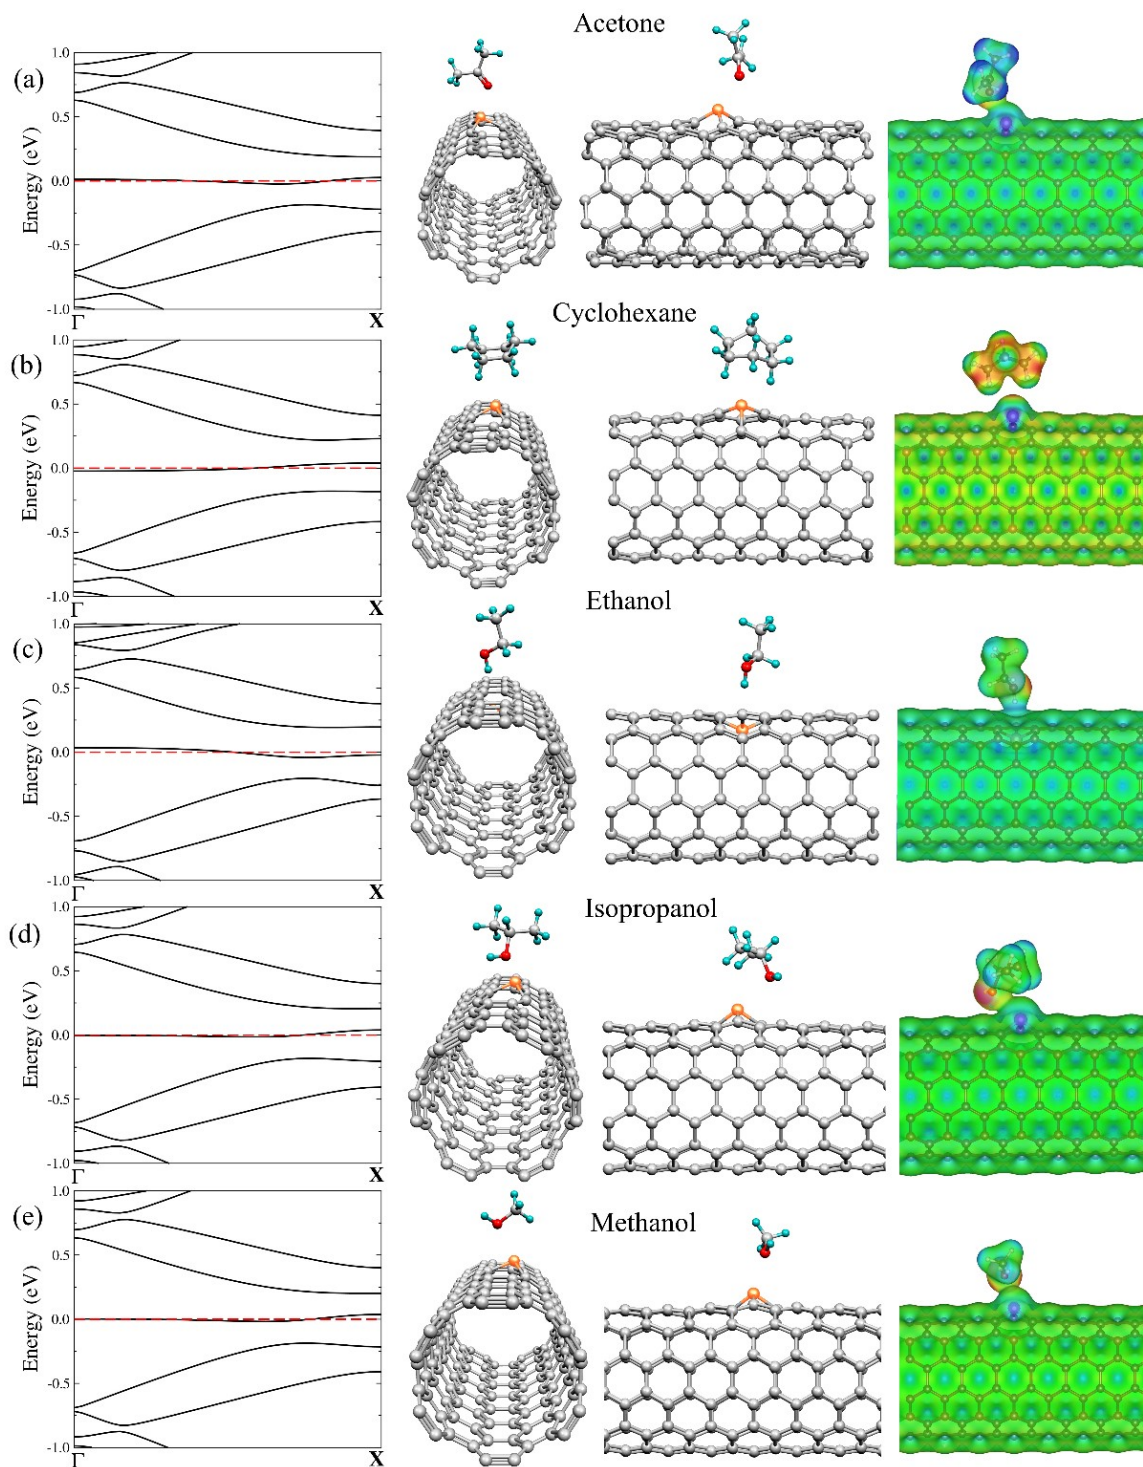

Figure S6: Band structure, optimized structures, and electrostatic potential surface calculations of P-SWCNT(6,6) interacting with (a) acetone, (b) cyclohexane, (c) ethanol, (d) isopropanol, and (e) methanol molecules.

**Figure S7:** Armando D. Martínez-Iniesta et al.

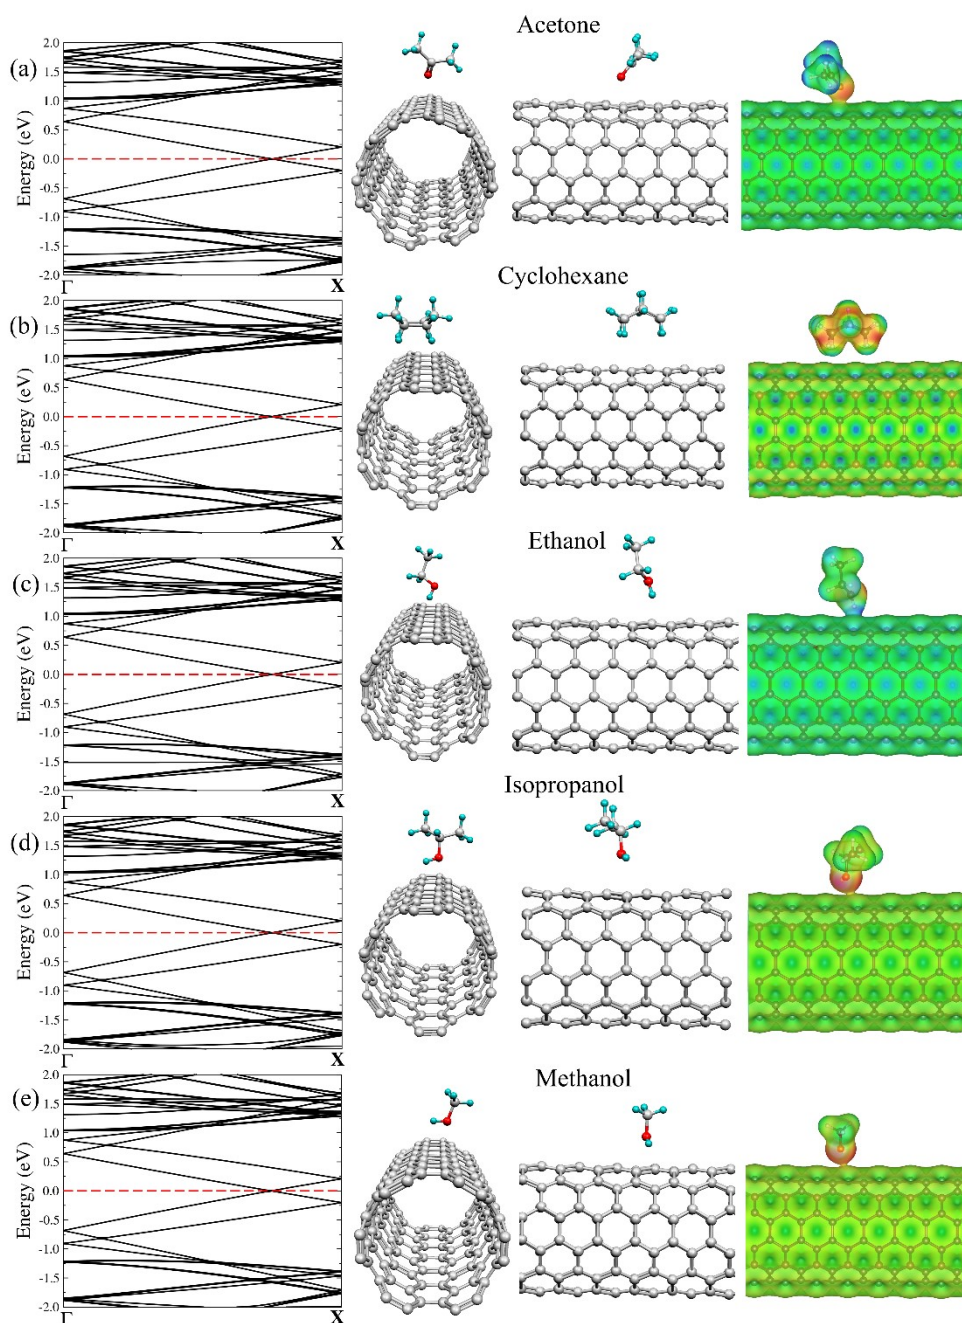

**Figure S7:** Band structure, optimized structures, and electrostatic potential surface calculations of pristine SWCNT(6,6) interacting with (a) acetone, (b) cyclohexane, (c) ethanol, (d) isopropanol, and (e) methanol molecules.

**Figure S8:** Armando D. Martínez-Iniesta et al.

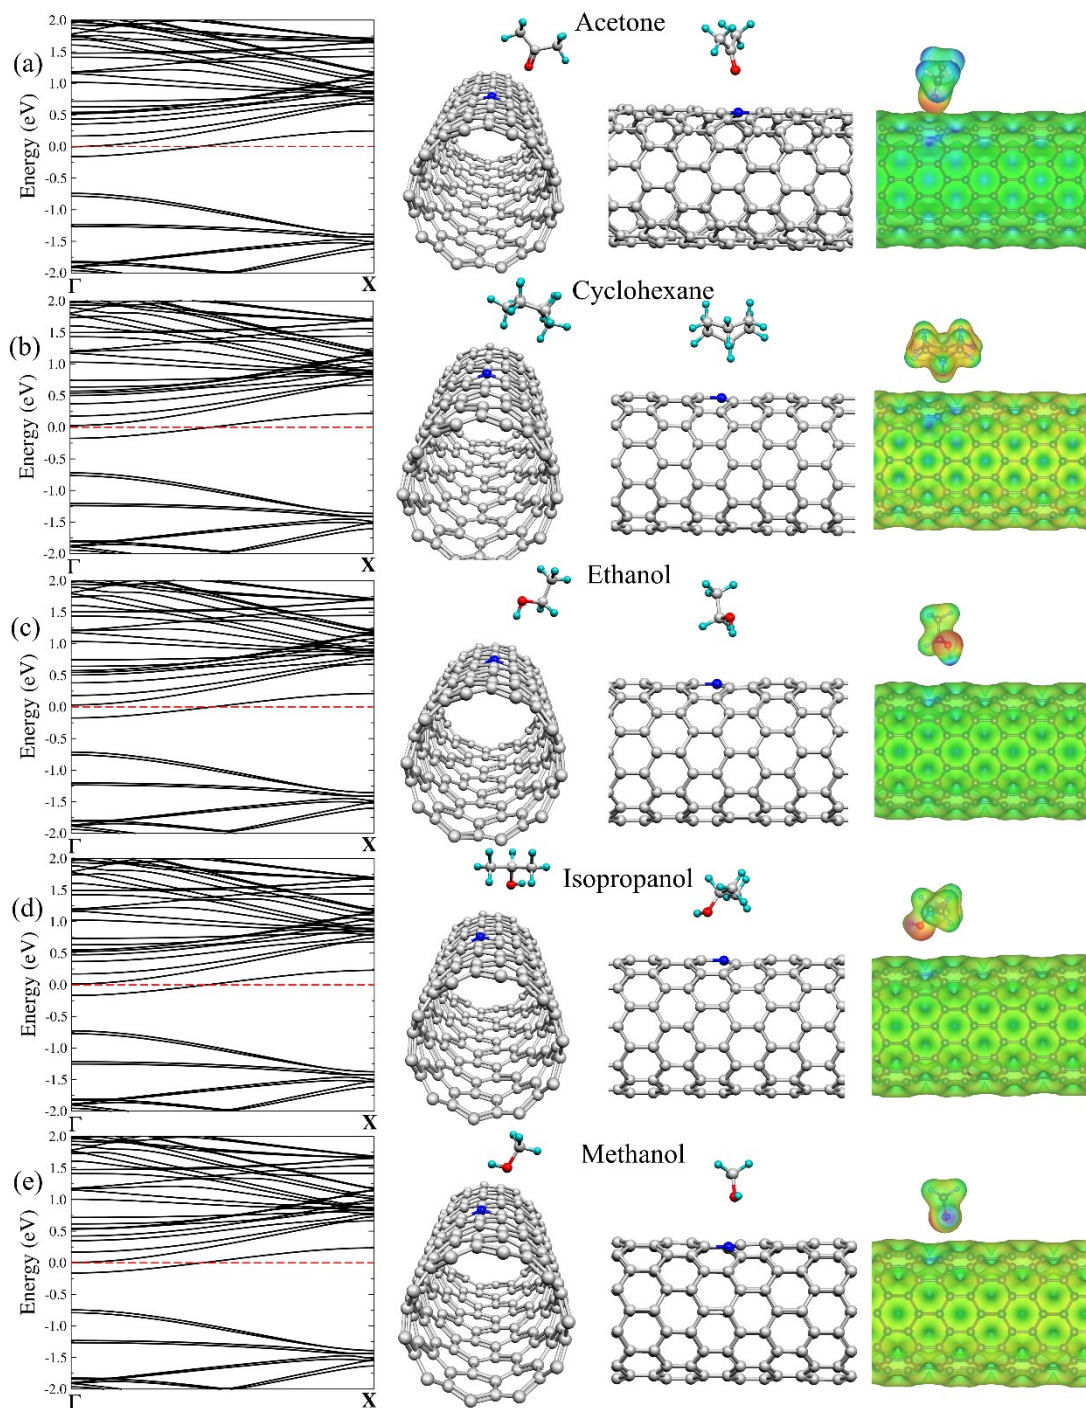

**Figure S8:** Band structure, optimized structures, and electrostatic potential surface calculations of N-SWCNT(10,0) interacting with (a) acetone, (b) cyclohexane, (c) ethanol, (d) isopropanol, and (e) methanol molecules.



**Figure S9:** Armando D. Martínez-Iniesta et al.

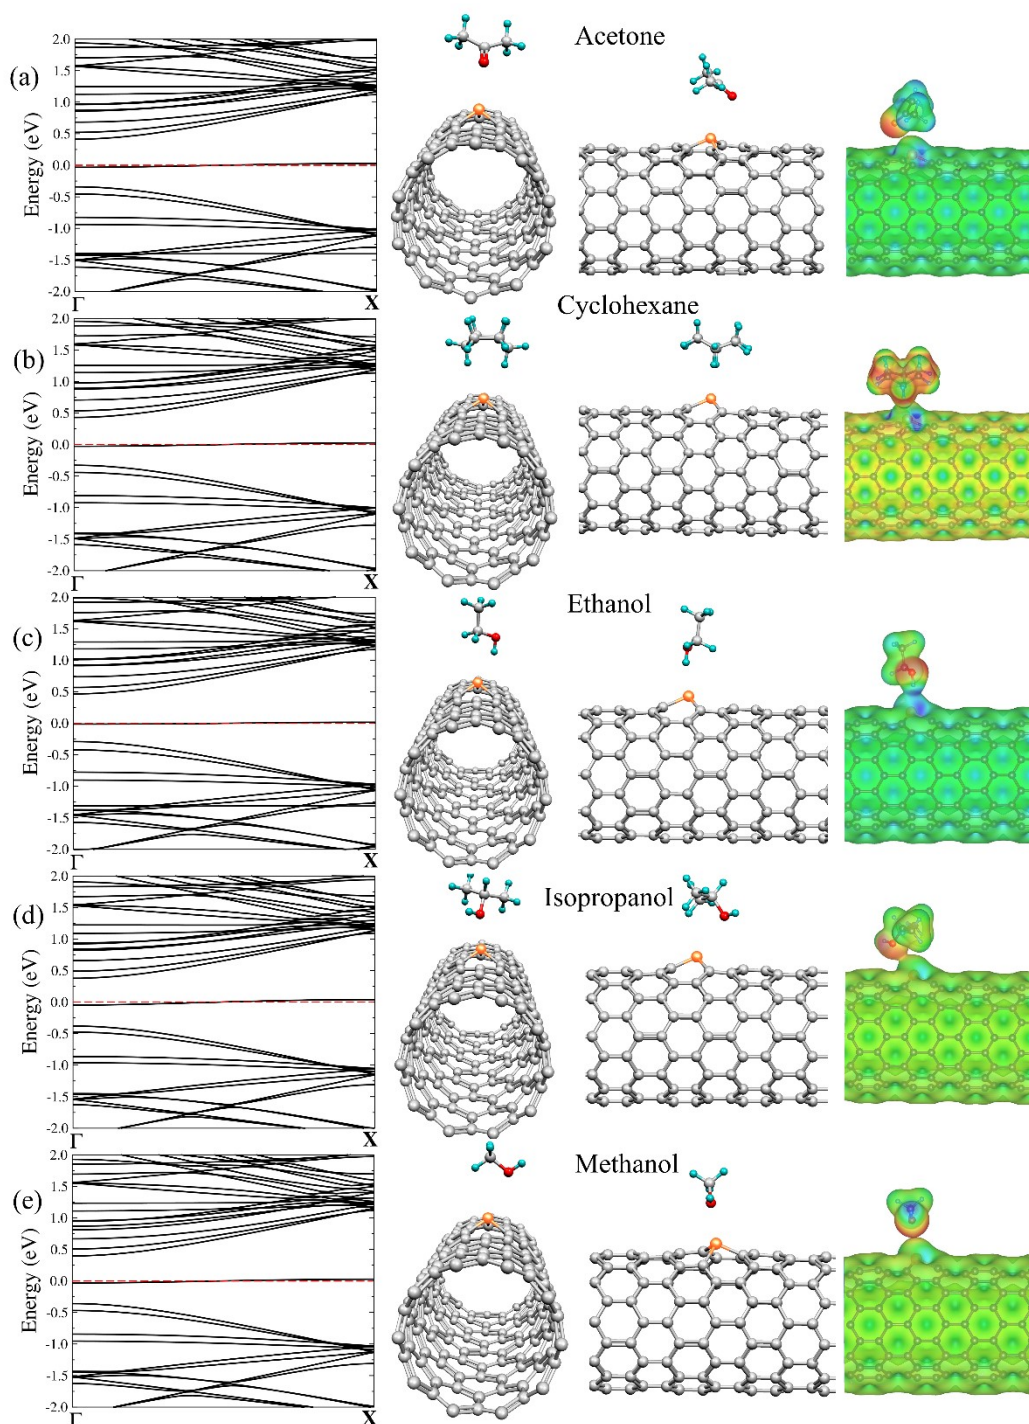

**Figure S9:** Band structure, optimized structures, and electrostatic potential surface calculations of P-SWCNT(10,0) interacting with (a) acetone, (b) cyclohexane, (c) ethanol, (d) isopropanol, and (e) methanol molecules.

**Figure S10:** Armando D. Martínez-Iniesta et al.

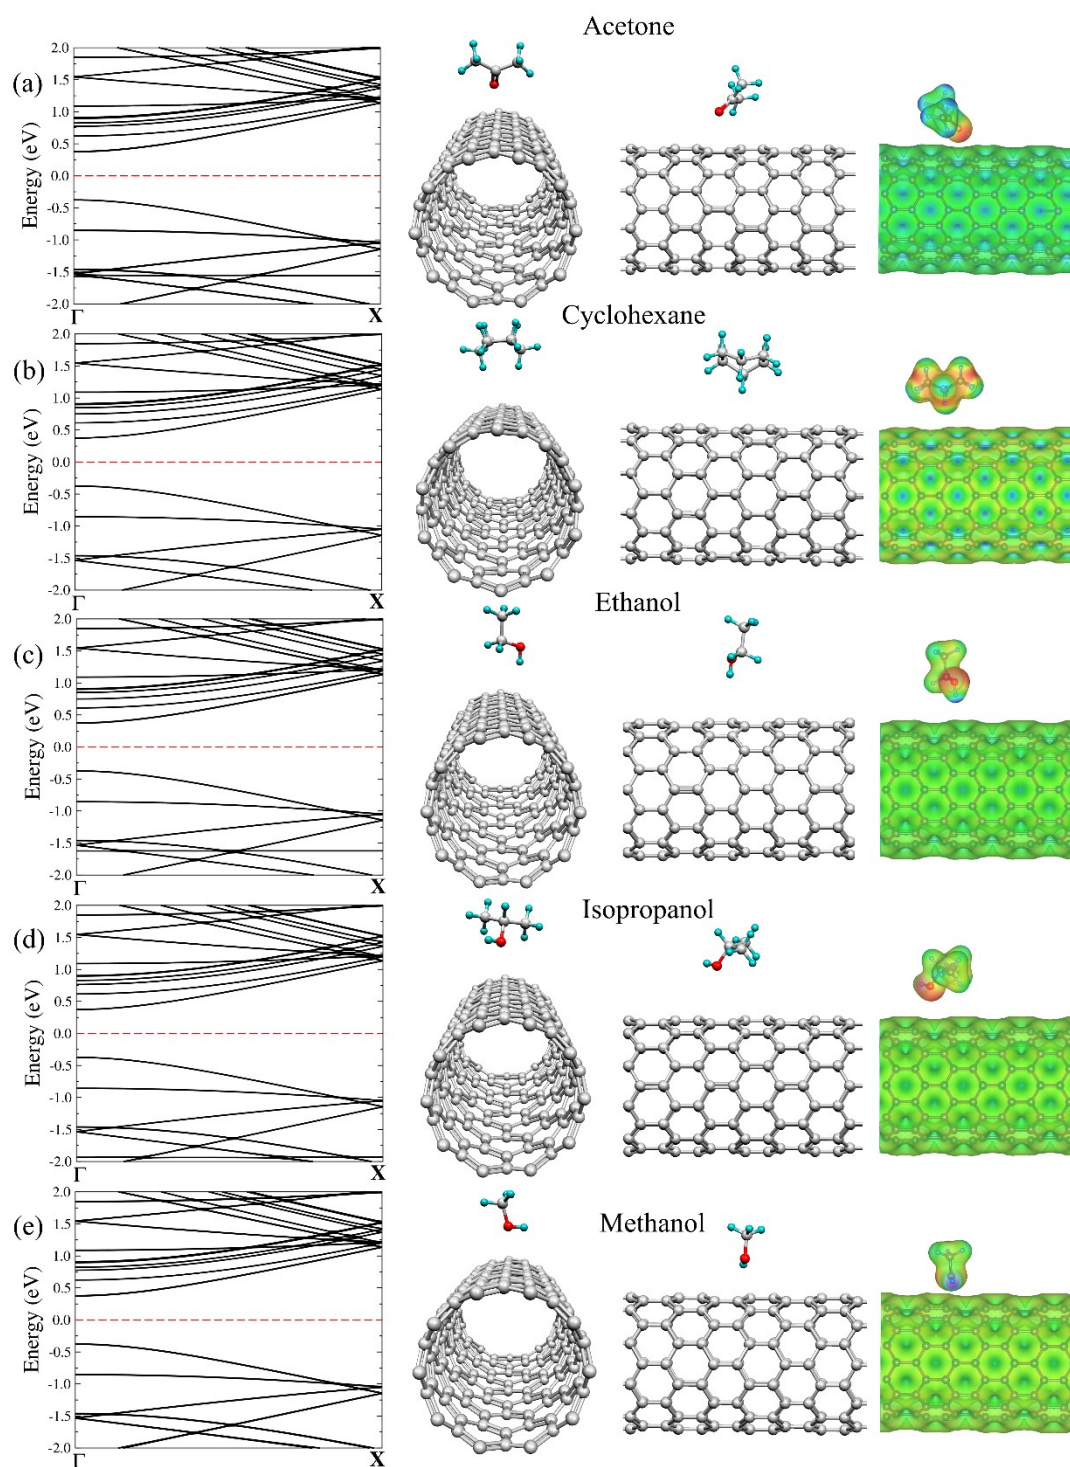

**Figure S10:** Band structure, optimized structures, and electrostatic potential surface calculations of pristine SWCNT(10,0) interacting with (a) acetone, (b) cyclohexane, (c) ethanol, (d) isopropanol, and (e) methanol molecules.

| Molecule           | N-SWCNTs | P-SWCNTs | NP-SWCNTs | NP-OH-SWCNTs | SWCNT    |
|--------------------|----------|----------|-----------|--------------|----------|
| <b>SWCNT(6,6)</b>  |          |          |           |              |          |
| Acetone            | 0.10660  | 0.16960  | 0.47949   | 0.02743      | 0.19814  |
| Cyclohexane        | -0.00214 | 0.02258  | 0.03332   | -0.05438     | 0.07658  |
| Ethanol            | 0.16091  | 0.05466  | -0.02267  | -0.09798     | 0.14956  |
| Isopropanol        | 0.08713  | 0.15245  | 0.13028   | 0.21614      | 0.19820  |
| Methanol           | 0.09061  | 0.16573  | 0.11148   | -0.01801     | 0.14582  |
| <b>SWCNT(10,0)</b> |          |          |           |              |          |
| Acetone            | -0.02961 | 0.00965  | 0.04131   | 0.03720      | 0.04738  |
| Cyclohexane        | -0.01820 | 0.05918  | 0.08272   | -0.01299     | -0.01876 |
| Ethanol            | -0.01393 | -0.03174 | -0.04131  | -0.01968     | -0.02937 |
| Isopropanol        | -0.04810 | 0.03657  | 0.10938   | -0.12570     | -0.02249 |
| Methanol           | 0.00746  | 0.01067  | 0.03923   | -0.19570     | 0.04599  |

**Table S1:** Armando D. Martínez-Iniesta et al.

**Table S1:** GGA-PBE calculations of adsorption energy ( $E^{\text{cp}_{\text{int}}}$ ) in eV units for gas molecules placed on the surface of single walled carbon nanotubes (SWCNTs). Results for nitrogen-doped SWCNTs (N-SWCNTs), phosphorus-doped SWCNTs (P-SWCNTs), nitrogen-phosphorus-codoped SWCNTs (NP-SWCNTs), OH-functionalization of NP-SWCNTs (NP-OH-SWCNTs), and pristine SWCNTs. Negative adsorption energy value indicates a stable configuration and exothermic adsorption.
